# Supplementary material for: Light and immunostimulant mediated in situ re-education of tumor-associated macrophages using photosensitizer conjugated mannan nanoparticles for boosting immuno-photodynamic anti-metastasis therapy
Source: Royal Society of Chemistry journal article supplement (doi:10.1039/d2bm01508k), 2022-11-07
Supplement: d2bm01508k1.pdf [file d2bm01508k1.pdf]

## Supporting Information

### Light and immunostimulant mediated *in-situ* re-education of tumor-associated macrophages by photosensitizer conjugated mannan nanoparticles for boosting immuno-photodynamic anti-metastasis therapy.

Saji Uthaman,<sup>1,4†</sup>, Shameer Pillarisetti<sup>2†</sup>, Youn-Mook Lim<sup>3</sup>, Jin-Oh Jeong<sup>3</sup>, Rizia Bardhan<sup>4</sup>, Kang Moo Huh<sup>1\*</sup>, In-Kyu Park<sup>2\*\*</sup>

<sup>1</sup>Department of Polymer Science and Engineering, Chungnam National University, 99 Daehak-ro, Yuseong-gu, Daejeon, 34134, Republic of Korea.

<sup>2</sup>Department of Biomedical Sciences and BioMedical Sciences Graduate Program (BMSGP), Chonnam National University Medical School, Gwangju 61469, Republic of Korea

<sup>3</sup>Advanced Radiation Technology Institute, Korea Atomic Energy Research Institute, Jeongeup-si, Jeollabuk-do, 56212, Republic of Korea

<sup>4</sup> Department of Chemical and Biological Engineering, Iowa State University, Ames, Iowa 50012, United States of America.

<sup>†</sup>These authors contributed equally.

\*Corresponding author e-mail: [khuh@cnu.ac.kr](mailto:khuh@cnu.ac.kr)

\*\*Corresponding author e-mail: [pik96@jnu.ac.kr](mailto:pik96@jnu.ac.kr)

#### Materials

N-(3-dimethylaminopropyl) -N'-ethylcarbodiimide hydrochloride (EDC), N-hydroxysuccinimide (NHS), N, N'-dicyclohexylcarbodiimide (DCC), dimethyl sulfoxide (DMSO), dimethylformamide (DMF), dimethyl sulfoxide-d<sub>6</sub> (DMSO-d<sub>6</sub>), and mannan from *Saccharomyces cerevisiae* were purchased from Sigma-Aldrich (MO, USA). Chlorine e6 (Ce6) was purchased from Cyaman chemicals (MI, USA). Resiquimod (R848) was bought from BOC sciences (NY, USA). Fetal bovine serum (FBS), DMEM, trypsin-EDTA, and penicillin-streptomycin were purchased from Welgene (Gyeongsan, Korea). Spectra/Pro membranes were obtained from Spectrum Laboratories Inc. (Rancho Dominguez, CA, USA). Other solvents and reagents were of analytical grade and used as received.

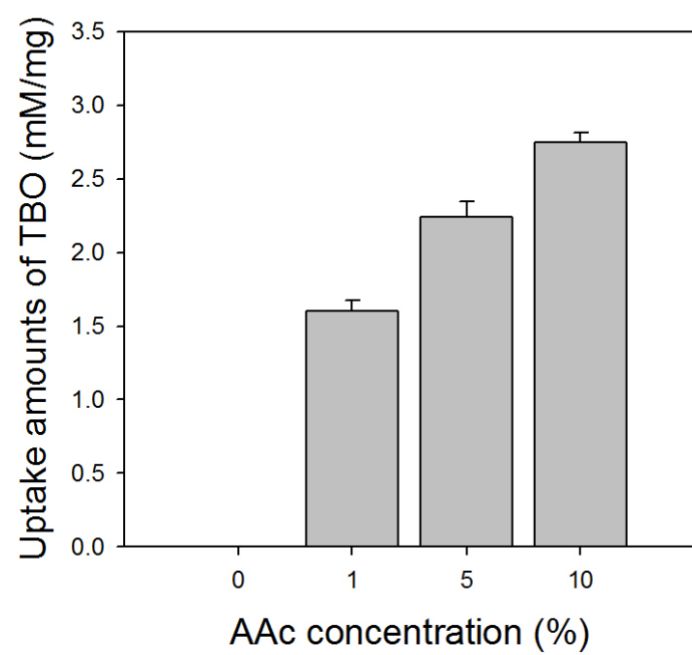

**Fig. S1.** Quantification for COOH groups in naïve Mannan and AAc grafted mannan estimated with Toluidine Blue O (TBO) assay.

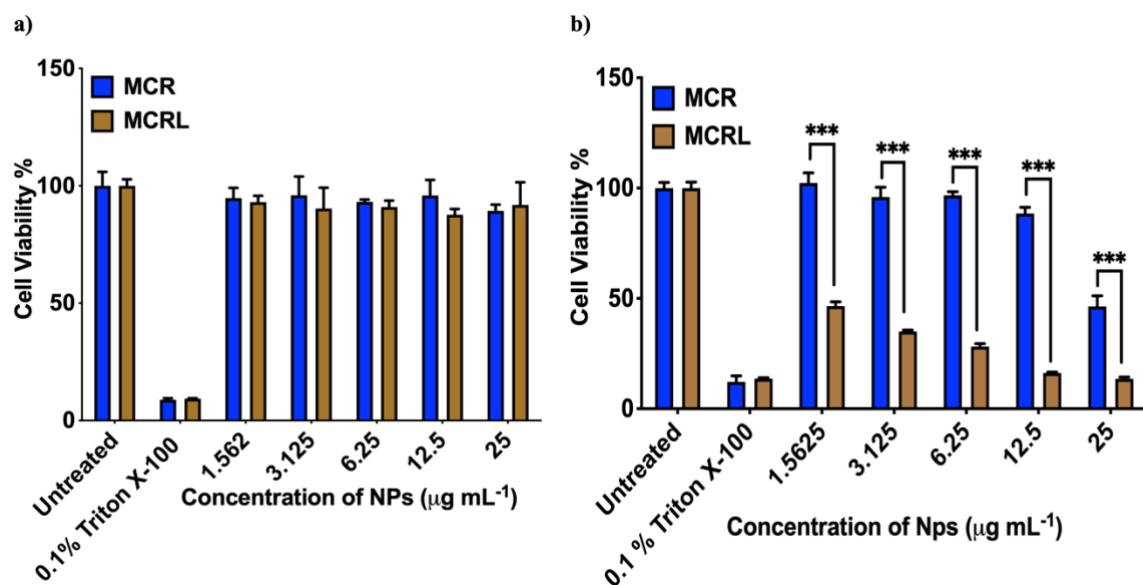

**Fig. S2.** Effects of MCR and MCRL on cell viability of a) CT-26 and b) M2-like macrophages using WST-1 assay.

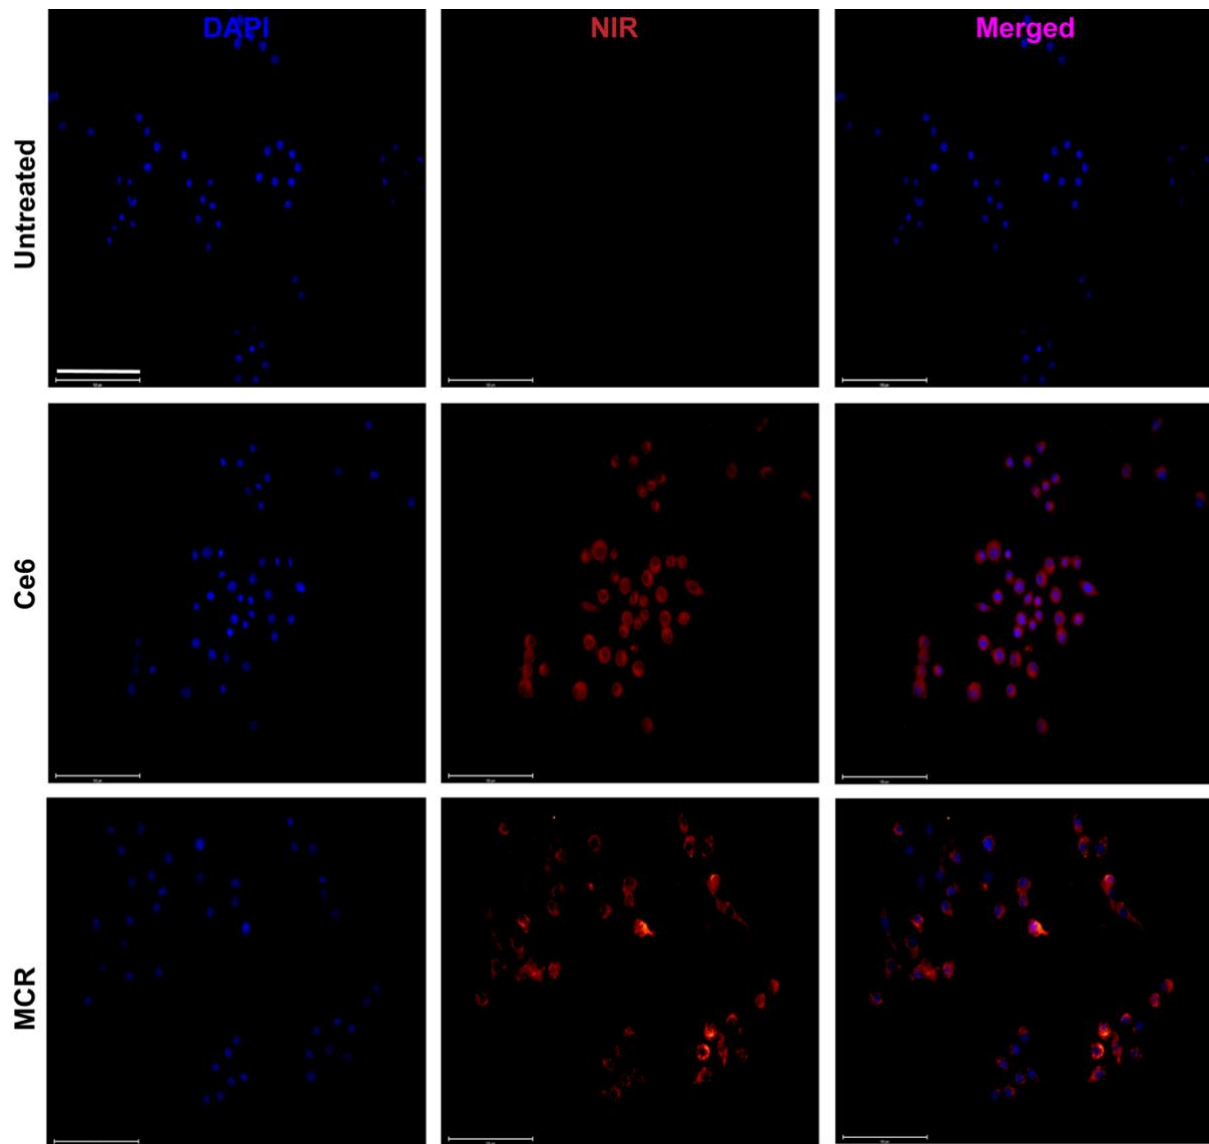

**Fig. S3.** Fluorescence microscopy images demonstrating intracellular uptake of MCR by M2- like macrophages obtained from J774.1 cells. Scale bar = 100  $\mu$ m.

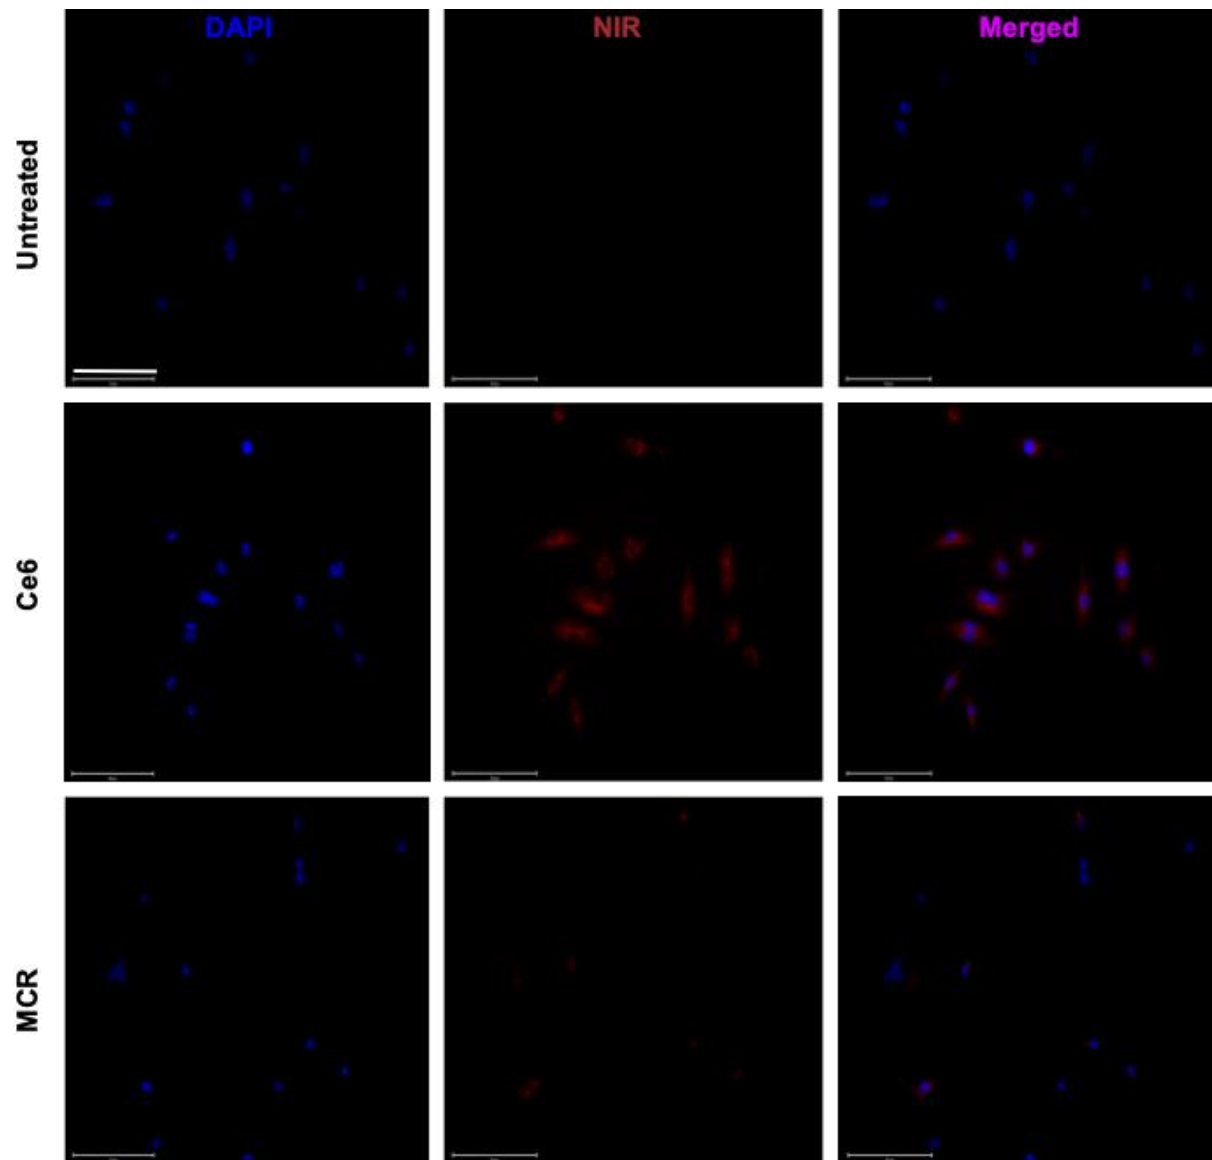

**Fig. S4.** Fluorescence microscopy images demonstrating intracellular uptake of MCR by M1- like macrophages obtained from J774.1 cells. Scale bar = 100  $\mu$ m.

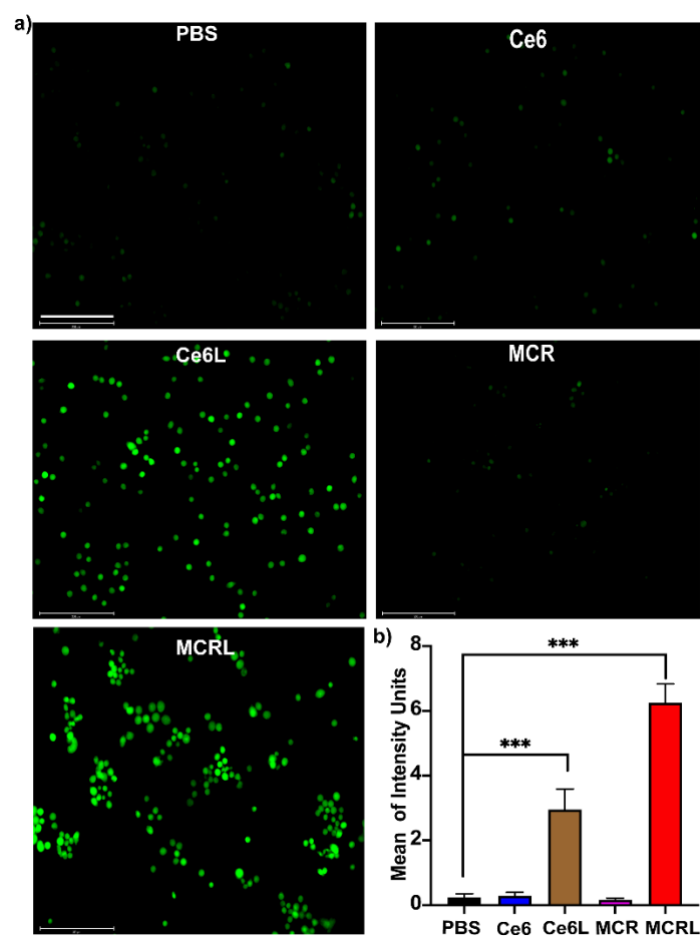

**Fig. S5.** a) Fluorescence microscopy images. b) Bar graph depicting intracellular ROS production of MCR in the presence or absence of laser irradiation. Scale bar = 100  $\mu$ m.

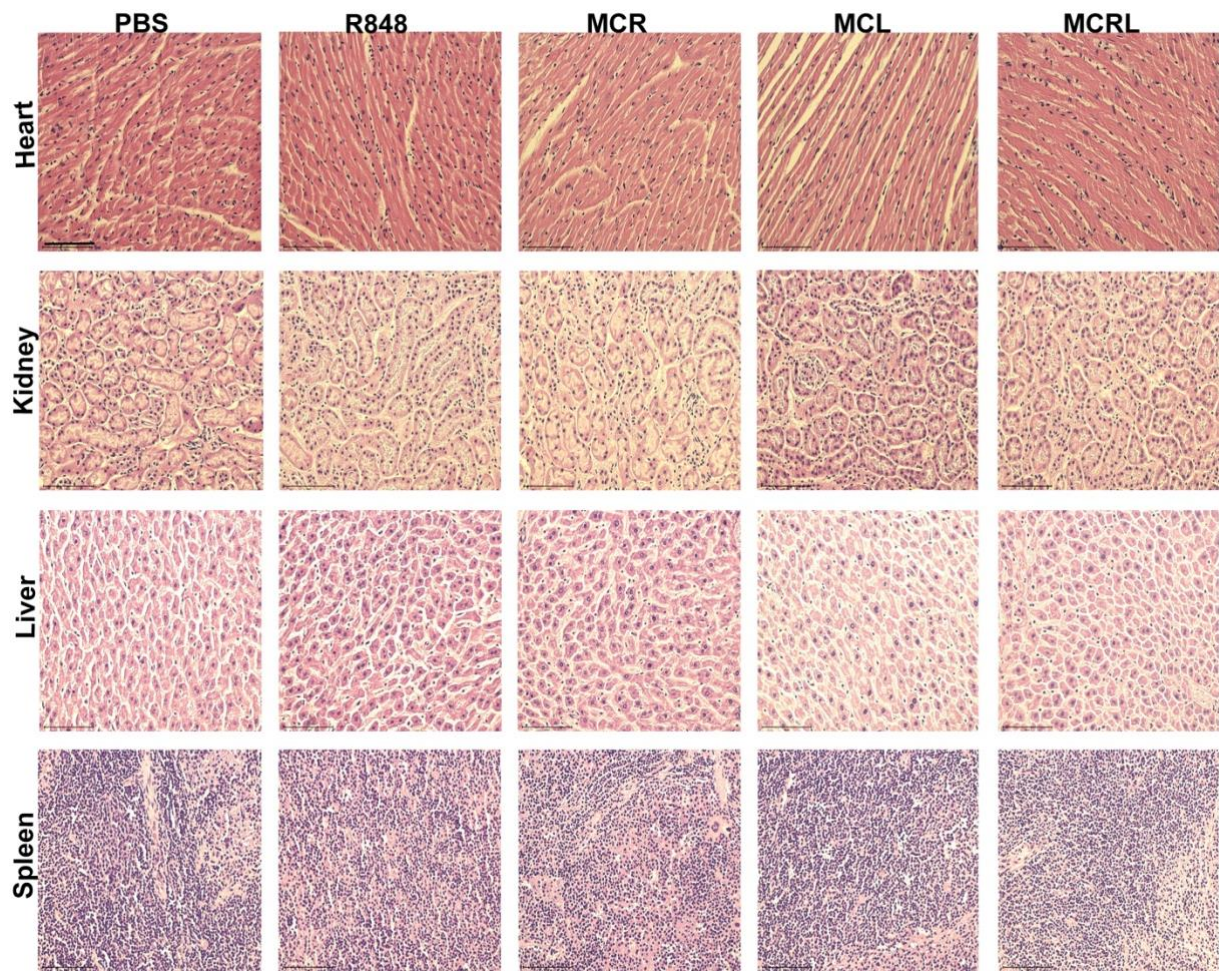

**Fig. S6.** Representative images of H&E staining of heart, kidney, liver, and spleen on day 18. Scale bar = 100  $\mu$ m.
